# Supplementary material for: Copper(ii) 5-methoxyisophthalate coordination polymers incorporating dipyridyl co-ligands: syntheses, crystal structures, and magnetic properties
Source: Royal Society of Chemistry journal article supplement (doi:10.1039/b920308g), 2010-01-01
Supplement: b920308g.pdf [file b920308g.pdf]

## Electronic Supplementary Information for

# Copper(II) 5-methoxyisophthalate coordination polymers incorporating dipyridyl co-ligands: Syntheses, crystal structures, and magnetic properties

Lu-Fang Ma,<sup>a</sup> Bin Liu,<sup>b</sup> Li-Ya Wang,<sup>a,\*</sup> Cheng-Peng Li<sup>c</sup> and Miao Du<sup>c,\*</sup>

<sup>a</sup> College of Chemistry and Chemical Engineering, Luoyang Normal University, Luoyang 471022, P. R. China

<sup>b</sup> Key Laboratory of Synthetic and Natural Functional Molecule Chemistry of Ministry of Education, Department of Chemistry, Northwest University, Xi'an 710069, P. R. China

<sup>c</sup> College of Chemistry and Life Science, Tianjin Key Laboratory of Structure and Performance for Functional Molecule, Tianjin Normal University, Tianjin 300387, P. R. China

Table S1. Selected bond lengths (Å) and angles (°) for **1**

|                   |           |                     |            |
|-------------------|-----------|---------------------|------------|
| Cu(1)-O(2)        | 1.972(3)  | N(2)-Cu(1)-N(1)#1   | 176.66(16) |
| Cu(1)-N(2)        | 2.017(4)  | O(2)-Cu(1)-O(3)#2   | 149.14(14) |
| Cu(1)-N(1)#1      | 2.027(4)  | N(2)-Cu(1)-O(3)#2   | 91.13(15)  |
| Cu(1)-O(3)#2      | 2.057(3)  | N(1)#1-Cu(1)-O(3)#2 | 89.79(15)  |
| Cu(1)-O(1)#3      | 2.257(3)  | O(2)-Cu(1)-O(1)#3   | 119.86(13) |
| O(2)-Cu(1)-N(2)   | 93.15(15) | N(2)-Cu(1)-O(1)#3   | 89.08(15)  |
| O(2)-Cu(1)-N(1)#1 | 87.70(15) | N(1)#1-Cu(1)-O(1)#3 | 87.70(14)  |

Symmetry codes: #1 x, y-1, z+1; #2 x+1, y, z; #3 -x+2, -y+1, -z+1.

Table S2. Selected bond lengths (Å) and angles (°) for **2**

|                    |          |                    |          |
|--------------------|----------|--------------------|----------|
| Cu(1)-O(2)         | 1.948(6) | O(10)-Cu(1)-O(6)   | 157.7(3) |
| Cu(1)-O(4)#1       | 1.950(6) | O(2)-Cu(1)-N(1)    | 91.8(3)  |
| Cu(1)-O(10)        | 2.002(6) | O(4)#1-Cu(1)-N(1)  | 97.6(3)  |
| Cu(1)-O(6)         | 2.010(6) | O(10)-Cu(1)-N(1)   | 106.0(3) |
| Cu(1)-N(1)         | 2.144(8) | O(6)-Cu(1)-N(1)    | 96.3(3)  |
| Cu(2)-O(9)         | 1.938(6) | O(9)-Cu(2)-O(7)    | 176.9(3) |
| Cu(2)-O(7)         | 1.947(6) | O(9)-Cu(2)-O(3)#1  | 90.4(3)  |
| Cu(2)-O(3)#1       | 1.998(6) | O(7)-Cu(2)-O(3)#1  | 90.6(3)  |
| Cu(2)-O(1)         | 2.013(6) | O(9)-Cu(2)-O(1)    | 89.8(3)  |
| Cu(2)-O(12)        | 2.191(6) | O(7)-Cu(2)-O(1)    | 88.4(3)  |
| O(2)-Cu(1)-O(4)#1  | 170.6(3) | O(3)#1-Cu(2)-O(1)  | 163.9(3) |
| O(2)-Cu(1)-O(10)   | 89.8(3)  | O(9)-Cu(2)-O(12)   | 93.0(3)  |
| O(4)#1-Cu(1)-O(10) | 87.3(3)  | O(7)-Cu(2)-O(12)   | 89.6(3)  |
| O(2)-Cu(1)-O(6)    | 89.8(3)  | O(3)#1-Cu(2)-O(12) | 101.6(3) |

To whom correspondence should be addressed.

E-mail address: [wlya@lynu.edu.cn](mailto:wlya@lynu.edu.cn) (L.-Y. Wang), Tel./Fax: +86-379-65511205;

E-mail address: [dumiao@public.tpt.tj.cn](mailto:dumiao@public.tpt.tj.cn) (M. Du), Tel./Fax: +86-22-23766556.

|                   |         |                  |         |
|-------------------|---------|------------------|---------|
| O(4)#1-Cu(1)-O(6) | 89.6(3) | O(1)-Cu(2)-O(12) | 94.4(3) |
|-------------------|---------|------------------|---------|

Symmetry codes: #1 -x+1/2, -y+2, z+1/2.

Table S3. Selected bond lengths (Å) and angles (°) for **3**

|                     |            |                     |            |
|---------------------|------------|---------------------|------------|
| Cu(1)-O(3)#1        | 1.970(2)   | O(7)-Cu(1)-O(9)#2   | 164.65(11) |
| Cu(1)-O(1)          | 1.971(2)   | O(3)#1-Cu(1)-N(1)   | 93.95(11)  |
| Cu(1)-O(7)          | 1.972(2)   | O(1)-Cu(1)-N(1)     | 97.94(11)  |
| Cu(1)-O(9)#2        | 1.982(2)   | O(7)-Cu(1)-N(1)     | 106.12(11) |
| Cu(1)-N(1)          | 2.147(3)   | O(9)#2-Cu(1)-N(1)   | 88.96(11)  |
| Cu(2)-O(4)#1        | 1.952(2)   | O(4)#1-Cu(2)-O(6)   | 90.02(11)  |
| Cu(2)-O(6)          | 1.963(2)   | O(4)#1-Cu(2)-O(2)   | 168.04(10) |
| Cu(2)-O(2)          | 1.975(2)   | O(6)-Cu(2)-O(2)     | 89.50(11)  |
| Cu(2)-O(8)#2        | 1.984(2)   | O(4)#1-Cu(2)-O(8)#2 | 88.58(11)  |
| Cu(2)-O(11)         | 2.197(2)   | O(6)-Cu(2)-O(8)#2   | 170.57(10) |
| O(3)#1-Cu(1)-O(1)   | 167.64(11) | O(2)-Cu(2)-O(8)#2   | 89.95(11)  |
| O(3)#1-Cu(1)-O(7)   | 91.32(11)  | O(4)#1-Cu(2)-O(11)  | 93.09(10)  |
| O(1)-Cu(1)-O(7)     | 88.60(11)  | O(6)-Cu(2)-O(11)    | 103.45(10) |
| O(3)#1-Cu(1)-O(9)#2 | 90.46(11)  | O(2)-Cu(2)-O(11)    | 98.64(10)  |
| O(1)-Cu(1)-O(9)#2   | 86.43(11)  | O(8)#2-Cu(2)-O(11)  | 85.94(10)  |

Symmetry codes: #1 x-1/2, -y+1/2, -z+1; #2 x, -y+1/2, z-1/2.

Table S4. Selected bond lengths (Å) and angles (°) for **4**

|                    |            |                      |            |
|--------------------|------------|----------------------|------------|
| Cu(1)-O(9)#1       | 1.958(3)   | O(11)-Cu(2)-O(8)#1   | 87.81(13)  |
| Cu(1)-O(7)         | 1.971(2)   | O(2)-Cu(2)-O(8)#1    | 88.91(12)  |
| Cu(1)-O(1)         | 1.978(3)   | O(6)-Cu(2)-O(8)#1    | 164.27(11) |
| Cu(1)-O(12)        | 1.989(3)   | O(11)-Cu(2)-N(3)     | 96.36(12)  |
| Cu(1)-N(1)         | 2.157(3)   | O(2)-Cu(2)-N(3)      | 93.14(12)  |
| Cu(2)-O(11)        | 1.941(3)   | O(6)-Cu(2)-N(3)      | 98.11(12)  |
| Cu(2)-O(2)         | 1.955(3)   | O(8)#1-Cu(2)-N(3)    | 97.60(11)  |
| Cu(2)-O(6)         | 2.002(2)   | O(11)-Cu(2)-Cu(1)    | 87.52(8)   |
| Cu(2)-O(8)#1       | 2.016(3)   | O(2)-Cu(2)-Cu(1)     | 83.03(8)   |
| Cu(2)-N(3)         | 2.149(3)   | O(6)-Cu(2)-Cu(1)     | 80.84(8)   |
| Cu(3)-O(13)#2      | 1.953(3)   | O(8)#1-Cu(2)-Cu(1)   | 83.55(8)   |
| Cu(3)-O(3)         | 1.966(3)   | N(3)-Cu(2)-Cu(1)     | 175.99(9)  |
| Cu(3)-N(2)#3       | 2.001(4)   | O(13)#2-Cu(3)-O(3)   | 179.37(13) |
| Cu(3)-N(4)#4       | 2.013(3)   | O(13)#2-Cu(3)-N(2)#3 | 91.22(13)  |
| O(9)#1-Cu(1)-O(7)  | 170.56(12) | O(3)-Cu(3)-N(2)#3    | 89.41(13)  |
| O(9)#1-Cu(1)-O(1)  | 89.29(13)  | O(13)#2-Cu(3)-N(4)#4 | 87.52(12)  |
| O(7)-Cu(1)-O(1)    | 87.70(13)  | O(3)-Cu(3)-N(4)#4    | 91.85(13)  |
| O(9)#1-Cu(1)-O(12) | 90.37(12)  | N(2)#3-Cu(3)-N(4)#4  | 178.66(16) |
| O(7)-Cu(1)-O(12)   | 90.11(12)  | O(1)-Cu(1)-N(1)      | 99.92(12)  |
| O(1)-Cu(1)-O(12)   | 164.24(11) | O(12)-Cu(1)-N(1)     | 95.82(12)  |
| O(9)#1-Cu(1)-N(1)  | 94.42(12)  | O(11)-Cu(2)-O(2)     | 170.28(11) |
| O(7)-Cu(1)-N(1)    | 94.91(12)  | O(11)-Cu(2)-O(6)     | 89.60(12)  |

Symmetry codes: #1 x, -y, z+1/2; #2 x-1, y, z; #3 x-1/2, -y-1/2, z+1/2; #4 x-1/2, -y+1/2, z-1/2.

Table S5. Selected bond lengths (Å) and angles (°) for **5**

|                     |            |                   |            |
|---------------------|------------|-------------------|------------|
| Cu(1)-O(9)#1        | 1.924(3)   | O(9)#1-Cu(1)-O(9) | 86.83(13)  |
| Cu(1)-O(1)          | 1.946(3)   | O(1)-Cu(1)-O(9)   | 98.50(13)  |
| Cu(1)-O(3)#2        | 1.959(4)   | O(3)#2-Cu(1)-O(9) | 100.61(15) |
| Cu(1)-O(7)          | 1.995(4)   | O(7)-Cu(1)-O(9)   | 79.08(15)  |
| Cu(1)-O(9)          | 2.350(4)   | O(9)-Cu(2)-O(4)#3 | 94.03(14)  |
| Cu(2)-O(9)          | 1.908(3)   | O(9)-Cu(2)-O(2)   | 90.32(14)  |
| Cu(2)-O(4)#3        | 1.957(3)   | O(4)#3-Cu(2)-O(2) | 168.42(15) |
| Cu(2)-O(2)          | 1.981(3)   | O(9)-Cu(2)-N(1)   | 175.56(17) |
| Cu(2)-N(1)          | 1.998(4)   | O(4)#3-Cu(2)-N(1) | 87.58(16)  |
| Cu(2)-O(7)          | 2.400(4)   | O(2)-Cu(2)-N(1)   | 87.34(16)  |
| O(9)#1-Cu(1)-O(1)   | 174.65(15) | O(9)-Cu(2)-O(7)   | 79.46(15)  |
| O(9)#1-Cu(1)-O(3)#2 | 94.60(14)  | O(4)#3-Cu(2)-O(7) | 89.74(14)  |
| O(1)-Cu(1)-O(3)#2   | 83.98(15)  | O(2)-Cu(2)-O(7)   | 101.62(14) |
| O(9)#1-Cu(1)-O(7)   | 92.13(15)  | N(1)-Cu(2)-O(7)   | 104.71(17) |
| O(1)-Cu(1)-O(7)     | 89.38(16)  | O(3)#2-Cu(1)-O(7) | 173.23(15) |

Symmetry codes: #1 -x+1/2, -y+1/2, -z; #2 -x+1/2, y+1/2, -z+1/2; #3 x, -y, z-1/2.

Table S6. Hydrogen-bonding geometries of complexes **1-5**

| D-H...A                | d(D-H) | d(H...A) | d(D...A)  | ∠(DHA) |
|------------------------|--------|----------|-----------|--------|
| <b>1</b>               |        |          |           |        |
| O(6)-H(2W)...O(3)#1    | 0.86   | 2.12     | 2.91(2)   | 152.6  |
| O(6)-H(1W)...O(3)      | 0.84   | 2.06     | 2.88(2)   | 166.3  |
| <b>2</b>               |        |          |           |        |
| O(12)-H(2W)...O(1) #2  | 0.86   | 2.27     | 3.000(10) | 143.3  |
| O(12)-H(1W)...O(7) #2  | 0.85   | 2.54     | 3.240(10) | 140.9  |
| O(12)-H(1W)...O(1)     | 0.85   | 2.61     | 3.088(9)  | 117.5  |
| <b>3</b>               |        |          |           |        |
| O(11)-H(1W)...O(10) #3 | 0.82   | 2.37     | 3.122(4)  | 152.3  |
| O(11)-H(2W)...N(2) #4  | 0.83   | 1.96     | 2.767(4)  | 165.8  |
| O(11)-H(2W)...N(2') #4 | 0.83   | 2.02     | 2.845(14) | 171.4  |
| <b>4</b>               |        |          |           |        |
| O(16)-H(2W)...O(18)    | 0.84   | 2.12     | 2.840(8)  | 143.9  |
| O(17)-H(4W)...O(16)    | 0.87   | 1.98     | 2.815(11) | 161.2  |
| O(16)-H(1W)...O(8)     | 0.85   | 2.41     | 3.255(6)  | 179.5  |
| O(16)-H(1W)...O(11)#5  | 0.85   | 2.67     | 3.115(6)  | 114.5  |
| O(18)-H(5W)...O(1)     | 0.84   | 2.33     | 3.107(7)  | 155.8  |
| O(18)-H(5W)...O(7)     | 0.84   | 2.81     | 3.125(7)  | 104.2  |
| <b>5</b>               |        |          |           |        |
| O(9)-H(9)...O(5)#6     | 0.98   | 1.95     | 2.848(5)  | 150.3  |

#1 -x+1,-y+1,-z+1; #2 -x,-y+2,-z+2; #3 -x+3/2,-y+1,z-1/2; #4 -x+3/2,-y,z-1/2; #5 x,-y,z-1/2; #6 x+1,y,z
